# Supplementary material for: Social engagement within the facility increased life expectancy in nursing home residents: a follow-up study
Source: PubMed Central journal article supplement (PMC7672974; doi:10.1186/s12877-020-01876-2), 2020-11-18
Supplement: 12877_2020_1876_MOESM1_ESM.pdf [file 12877_2020_1876_MOESM1_ESM.pdf]

**Supplementary Table 1.** Distribution of baseline characteristics by level of social engagement after standardization to the overall institutionalized population in Madrid, Spain.

| Characteristic               | Overall* | Level of social engagement† |          |      | P value‡ |
|------------------------------|----------|-----------------------------|----------|------|----------|
|                              |          | Low/null                    | Moderate | High |          |
| Age (years)                  |          |                             |          |      | 1.00     |
| 65–74                        | 15.7     | 14.7                        | 14.9     | 18.1 |          |
| 75–79                        | 16.4     | 15.0                        | 15.8     | 15.2 |          |
| 80–84                        | 25.6     | 28.8                        | 27.3     | 29.4 |          |
| 85–89                        | 23.8     | 24.1                        | 23.3     | 21.3 |          |
| ≥90                          | 18.5     | 17.6                        | 18.7     | 16.0 |          |
| Sex                          |          |                             |          |      | 0.90     |
| Women                        | 74.4     | 73.2                        | 71.8     | 70.2 |          |
| Men                          | 25.6     | 26.8                        | 28.2     | 29.8 |          |
| Educational level            |          |                             |          |      | 0.99     |
| Less than primary            | 45.3     | 47.8                        | 46.4     | 45.8 |          |
| Primary                      | 40.2     | 40.0                        | 39.5     | 42.1 |          |
| Secondary or more            | 14.6     | 12.2                        | 14.2     | 12.1 |          |
| Marital status               |          |                             |          |      | 0.90     |
| Married                      | 14.2     | 13.1                        | 14.3     | 17.7 |          |
| Single                       | 33.7     | 31.5                        | 32.8     | 26.3 |          |
| Widowed/divorced             | 52.1     | 55.4                        | 53.0     | 56.0 |          |
| Facility ownership           |          |                             |          |      | 0.99     |
| Public/subsidized            | 61.4     | 63.8                        | 63.4     | 64.2 |          |
| Private                      | 38.6     | 36.2                        | 36.6     | 35.8 |          |
| Facility size (beds)         |          |                             |          |      | 0.87     |
| <100                         | 20.8     | 19.2                        | 19.6     | 16.3 |          |
| 100–299                      | 37.1     | 38.5                        | 36.7     | 46.0 |          |
| ≥300                         | 42.1     | 42.3                        | 43.7     | 37.7 |          |
| Length of stay (years)       |          |                             |          |      | 0.89     |
| 0–1                          | 29.0     | 30.4                        | 29.3     | 32.5 |          |
| 2–4                          | 31.9     | 31.5                        | 32.1     | 36.9 |          |
| ≥5                           | 39.1     | 38.1                        | 38.5     | 30.5 |          |
| Assigned caregiver           |          |                             |          |      | 0.72     |
| No                           | 86.4     | 87.9                        | 85.0     | 83.4 |          |
| Yes                          | 13.6     | 12.1                        | 15.0     | 16.6 |          |
| Frequency of external visits |          |                             |          |      | 0.99     |
| Monthly or less              | 33.6     | 34.5                        | 36.3     | 33.5 |          |
| Weekly                       | 45.4     | 45.1                        | 44.9     | 44.1 |          |
| Daily                        | 21.0     | 20.4                        | 18.8     | 22.4 |          |
| No. of chronic conditions    |          |                             |          |      | 0.71     |
| 0–1                          | 30.0     | 29.1                        | 29.2     | 39.7 |          |
| 2–3                          | 45.9     | 47.3                        | 47.3     | 40.3 |          |
| ≥4                           | 24.1     | 23.6                        | 23.4     | 20.0 |          |
| Functional dependency        |          |                             |          |      | 0.95     |
| No                           | 35.0     | 34.3                        | 34.5     | 38.5 |          |
| Mild                         | 34.5     | 34.9                        | 35.0     | 28.8 |          |
| Moderate                     | 30.5     | 30.8                        | 30.5     | 32.7 |          |

\* Sampling-weighted percentages.

† Fully-weighted percentages taking into account both sampling and standardization weights.

‡ P value for homogeneity of fully-weighted percentages across levels of social engagement.

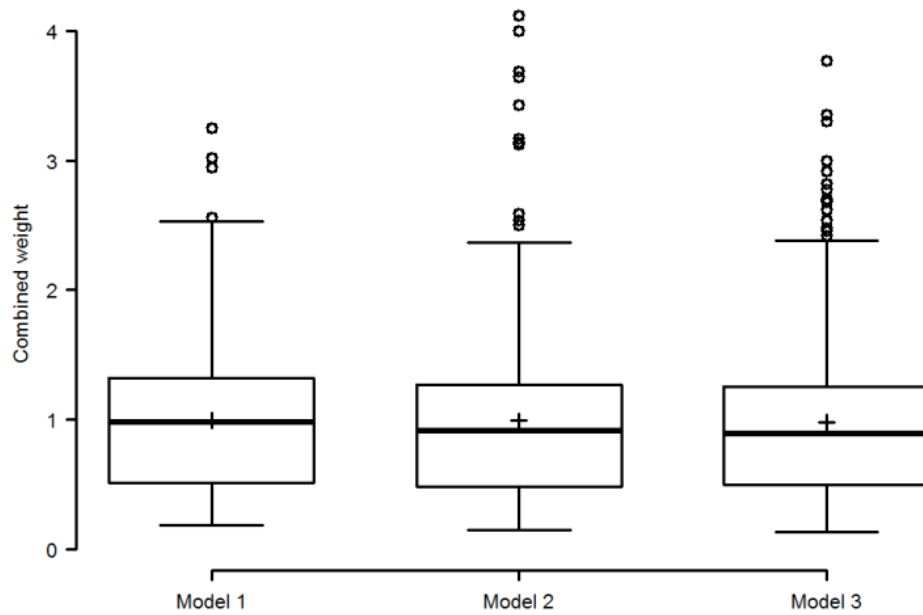

**Supplementary Figure 1.** Distribution of combined weights taking into account both sampling and standardization based on the three polytomous logistic models for baseline social engagement in care homes in Madrid, Spain.

Boxes represent the mean (+), median (middle horizontal line), quartiles (border horizontal lines), and individual outlying weights (circles).
